# Supplementary material for: Autophagy inhibition-mediated epithelial–mesenchymal transition augments local myofibroblast differentiation in pulmonary fibrosis
Source: PubMed Central journal article supplement (PMC6685977; doi:10.1038/s41419-019-1820-x), 2019-08-07

## Supplementary Figure 2

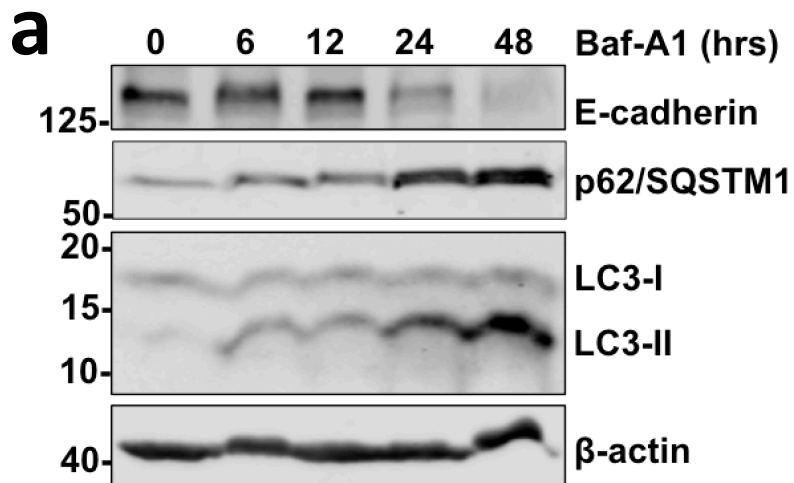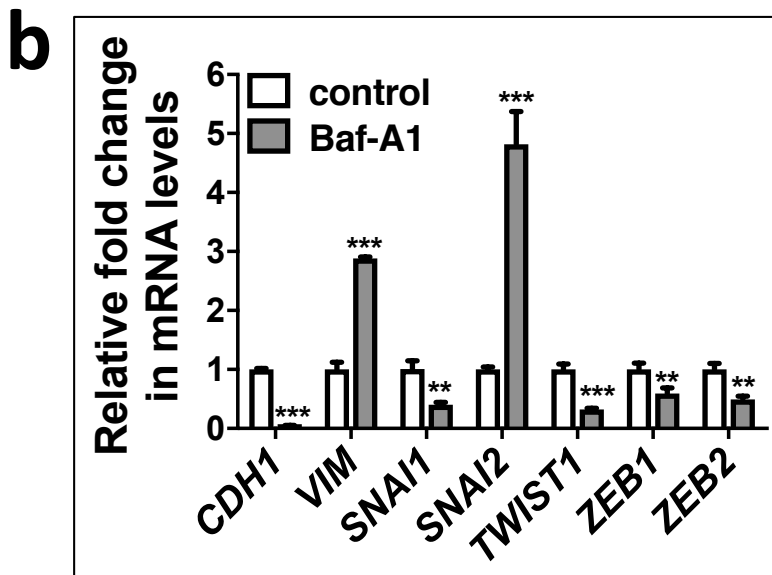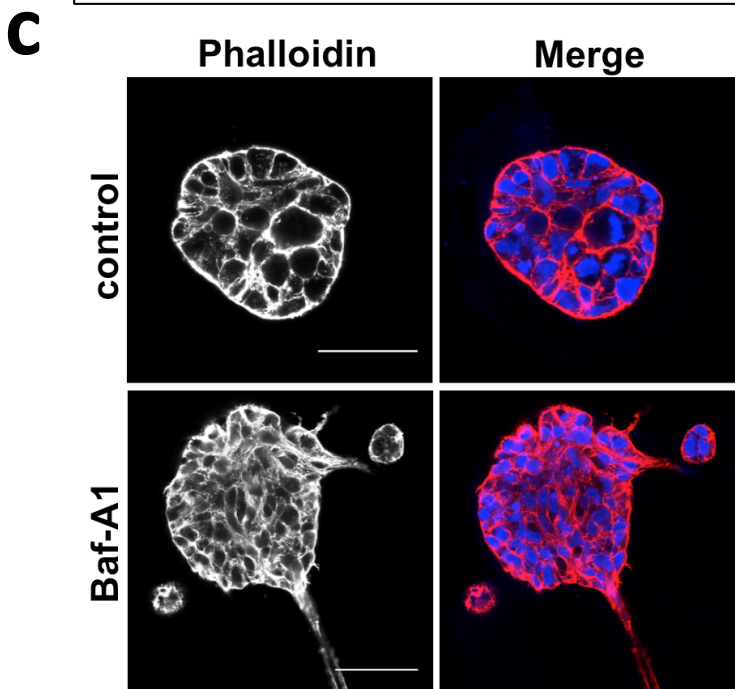

Supplement: 41419_2019_1820_MOESM3_ESM.pdf [file 41419_2019_1820_MOESM3_ESM.pdf]
